# Supplementary material for: Impact of climate change on persistent cold-air pools in an alpine valley during the 21st century
Source: Copernicus journal article supplement (doi:10.5194/egusphere-2023-1199), 2023-06-13
Supplement: Supplementary file [file egusphere-2023-1199-AC1-supplement.pdf]

## Authors' replies to Referee #1

We thank Referee #1 for their helpful suggestions and comments. Below, we provide our replies. The line numbers in our replies refer to the revised version.

### General comments

- a. The importance of surface warming as a driver of reduced stability during inversions is pointed out several times (line 336, 449, 472) and is important for the interpretation of the results. However, the detailed reason for such an increase of temperature during PCAP episodes is not explained clearly in the manuscript.*
  - b. The reference of Bailey et al. 2011 is provided at line 337 but I was not able to find relevant explanations there from a quick read.*
  - c. On the other hand, Fig. 9 shows an increase of around 4K for both surface and top of inversion (lines 369-374), and this might be indicative of warmer air at all levels due to advection, without obvious changes in stability.*
  - d. The authors need to point out the processes that would (eventually) enhance such a surface-based warming: for instance, are higher temperatures at the surface maybe due to changes in cloud cover, that modify the short-wave (daytime) or long-wave radiation balance?*

a. We now explain the origin of this surface warming. It can be attributed to the fact that, in the future, specific humidity will be higher (i.e. air will be richer in water vapor due to higher temperatures) and, thus, will enhance the “local greenhouse effect”, so that more infrared outgoing radiation is reflected back to the surface, increasing air temperature close to the surface. We explain this at the end of subsection 4.1 (L 347-349); we also include a new Figure (Figure S6) in the supplement showing the statistically significant increasing trend of specific humidity close to the surface. Reference to Philipona (2013) is also added, who pointed the importance of specific humidity in surface warming.

We also computed the temperature trends at 925 hPa and 850 hPa (new Figures S5 and S6 and L 339-347). These trends are significant and slightly lower than that of the temperature at 2 m, confirming that the negative trend of the PCAP temperature gradient is due to surface warming.

  - b. We removed the reference to Bailey et al. 2011.*
  - c. The temperature difference between the two episodes is best seen by displaying the vertical profiles of the temperature. These profiles have been added in the new Figure S9 (first row), see also L 384-387. They show that the future episode displays a marked inversion, which is stronger than for the episode in the past.*
  - d. We do not think that incoming and outgoing radiation is influenced by different cloud cover during the two episodes for the following reasons: the two episodes are characterised by anticyclones over Grenoble, so it is reasonable to suppose that there is no/scarce cloud cover in both episodes; moreover, if there were cloudy days, we would not see the temperature diurnal cycle near the surface that we can instead observe in Fig. 9.*
- 2. According to the performed simulations, the vertical stability seems to increase for stagnation events in a warmer climate, especially for the elevated thermal inversions (Fig. 11). This hints to the presence of warmer air above the inversion in the 2043 event, likely resulting from non-local processes such as advection. Together with a reduction in the height of the BL of ~100m, the model simulations would thus indicate a strengthening of thermal inversions, related mostly to the warming at upper-levels. This would be in contrast with the current interpretation of the results, which indicate an average reduction in inversion strength during the next century driven by surface-based warming. Can the authors please reconcile these contrasting results? Are there*

*reasons to expect extremes to follow a different trend than the mean?*

We would like to stress that this work consists in two types of analyses (statistical and deterministic, as written at L 83-86 of the Introduction) which allow to infer conclusions that are not in contrast (as now specifically added at L 387-390 and 471-473) but of different type. Therefore, we cannot assert a general sentence like the one above “*the vertical stability seems to increase for stagnation events in a warmer climate, especially for the elevated thermal inversions*” because this consideration exclusively refers to the comparison between Ep1988 and Ep2043, which are only two episodes among hundreds of possible episodes along the century. While we can study the impact of climate change on PCAPs with the first type of analysis, based on long-term trends, we can investigate the vertical structure of two PCAPs, one in the past and one in the future, with the second type of analysis. The results obtained for Ep2043 do not reflect the statistical trend computed over 120 years, but there is no contradiction because we analyse only two episodes. We now make this important point clear at the lines indicated above.

We also changed the titles of sections 5.1 (L 376) and 5.2 (L 405) to clarify that the analysis of section 5 is conducted for “the two PCAP episodes”.

3. *Given the fact that VHD does not appear to change substantially between the two events, can we conclude that what changes for PCAP events in a warmer climate is not the rate of cooling but rather the initial temperature at which cooling starts?*

As written in the previous reply, we cannot infer any general conclusion for “PCAP behavior in a warmer climate” from the deterministic analysis of two only episodes.

Regarding the VHD: this quantity is a bulk measure of stability and should therefore reflect the fact that the future episode is more stable than the past one. The value of the VHD actually depends upon the upper bound of the integral defining it. It is therefore important this upper bound to coincide with the height of the cold-air pool. In the submitted version, this upper bound was well above the top of the cold-air pool and, as a result, the values of the VHD were similar. We now adjusted this upper bound so that it coincides with the height of the cold-air pool (see L 415-416) and found that VHD is larger for the future episode than for the past one, as expected (see new values in Table 3). This result is also consistent with the fact that, when the potential temperature profile is linear, the VHD is related to height of the cold-air pool by the relation  $VHD = 0.5\rho c_p H_{inv} \Delta\theta$  where  $\Delta\theta$  is the temperature difference across the inversion (see L 441-443).

4. *It is not yet clear how the projected trends in inversion height and strength will reflect themselves in air quality, and some apparently contradictory statements are found in the manuscript. For instance, at lines 474-476 is written “the less stable winter atmosphere could positively impact the air quality”, but previous results (summarized at line 460) indicate that future episodes will feature “a lower inversion height”, which would worsen air quality. The contradiction is mostly between the effects of inversion strength and inversion height, but I would think that the latter is more important than the former, provided that a sufficiently strong inversion does not “break” during daytime.*

As stressed in the reply to point 2, we must differentiate the conclusions derived from the two types of analysis. From the statistical analysis, we find a negative trend of inversion stability over the century that suggests that the valley atmosphere will be less stable. However the decay rate of the temperature gradient inside the cold-air pool is so small (0.057 K/km per decade for scenario SSP5-8.5, this rate being non significant for scenario SSP2-4.5) that we cannot conclude that air quality will improve. This is what we write in the Conclusion (L 493-495).

From the deterministic analysis, which compares the two selected episodes, we find that the

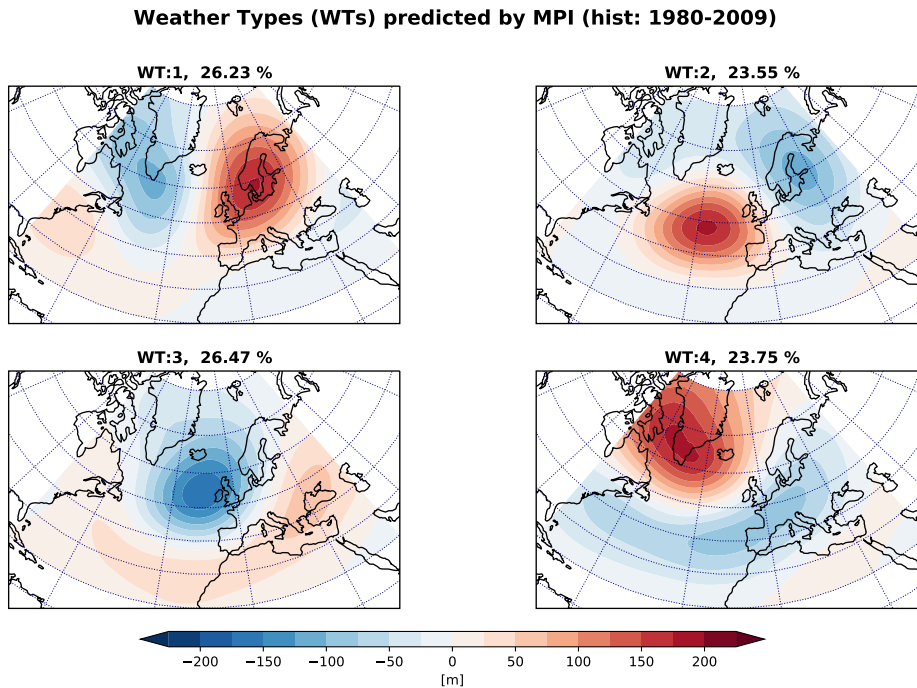

Figure 1: Weather types: WT1 = Scandinavian blocking, WT2 = Atlantic Ridge, WT3 = Positive NAO, WT4 = Negative NAO.

cold-air pool of Ep2043 has a strong stability so, during this type of episode, air quality will worsen. This is what we add on L 496-497.

### Technical/Typos/Etc...

- *Line 226: which value has been “rounded” and how?*  
The 30-year mean is -3.136 K/km; since it is close to -3 K/km, we rounded it to the nearest integer (as done in other works cited in the manuscript), i.e. to -3 K/km. We do not think it is relevant to add the value of -3.136 K/km in the manuscript.
- *Line 245-246: the definition based on 4 weather regimes confounds together Scandinavian blocking, European blocking and sometimes even Greenland blocking, that other authors would indicate as responsible of stagnation events over central Europe (e.g., 10.1088/1748-9326/ab38d3). Please provide reference(s), or indicate that this statement only refers to the  $k=4$  choice for weather regimes.*  
We are not sure in which sense the 4 regimes are confounded. In the reference cited by the Referee the four weather regimes are computed in the same way as done in this paper (apart from the fact that the four centroids are based on the reanalysis instead of on the GCM) and the patterns of the four weather regimes are totally in agreement with those in this work (see Figure 1 of this document). Only the so-called “Scandinavian blocking” is responsible for permanent anticyclonic conditions over France (like in Fig. S2) and, therefore, we focused on this weather regime; we specified this better in the revised version (L 248-257).
- *Line 269: at which level is the wind estimated?*  
The wind is estimated at 500 hPa (this is written in the caption of Fig. S2). We specified the level by writing: “The winds at 500 hPa over South-East France are...” in the revised version.

- *Line 381: “wind intrusion” is not commonly used and might be misleading, please use other formulations depending on the meteorological object associated with that wind maximum (e.g., is it a jet streak, maybe related to a small upper-level trough?).*

We changed the expression into “cold-air subsidence”. We must admit that we did not dig into the meteorological reason for this cold-air subsidence as it is not of interest for the analysis.

- *Lines 425-427: this sentence is not clear, because if the assumption is “not correct”, how can the assumption “approximately hold”? Please specify why the linear assumption is not anymore a good one for Ep2043, and whether the linear extrapolation to compute VHD is still useful.*  
This sentence has been removed.

- *Line 447: scenario corresponds to a statistically.*

Thanks. The sentence was corrected (i.e. “only the former scenario shows a statistically significant decreasing trend”, L 458).

- *Line 468: in which sense “become not significant”? This terms should be used only in the context of statistical tests.*

We agree with the Referee. The sentence was rephrased explaining that an ensemble of GCMs would take into account the inter-model variability and allow for the estimate of the model uncertainty (L 485-488).

- *Table 2: add asterisks or denote otherwise which changes are significant.*

Given the high variability within 30-year periods (visible in the temporal series in Fig. 8), there are no statistically significant results in Table 2 in the sense that future values (for the two 30-year periods and for the two scenarios) are always within the interval  $[(\text{mean around 2000}) \pm (\text{standard deviation})]$ .

- *Fig. 4, 5, would profit of small titles indicating which quantity is being looked at (e.g., “PCAP duration”, “PCAP stability”, etc...).*

Plot titles have been added in Figures 4 and 5.

- *Fig. 9, 11: mark the three days period chosen for averaging in both figures (lines 402-403).*

We marked the three days with a blue rectangle in both figures of the revised version (which are now Figures 9 and 10 as the former Figure 10 has been moved to the supplementary material).

- *Fig. 11: epThe*

Thanks for noticing this typo.
